# Supplementary material
Source: ML conference proceedings conference paper supplement (https://proceedings.mlr.press/v51/chen16b.html)
Supplement: Supplementary file 1 [file chen16b-supp.pdf]

## Appendix

### Proof of Theorem 2

First recall the following theorem from Verma and Pearl (1992); Meek (1995).

**Theorem 3** *Given a PDAG where all the v-structures are oriented, then the CPDAG can be obtained by repeatedly applying the following orientation rules:*

$R_1$  *Orient  $b-c$  into  $b \rightarrow c$  whenever there is an arrow  $a \rightarrow b$  such that  $a$  and  $c$  are nonadjacent.*

$R_2$  *Orient  $a-b$  into  $a \rightarrow b$  whenever there is chain  $a \rightarrow c \rightarrow b$ .*

$R_3$  *Orient  $a-b$  into  $a \rightarrow b$  whenever there are two chains  $a-c \rightarrow b$  and  $a-d \rightarrow b$  such that  $c$  and  $d$  are nonadjacent.*

$R_4$  *Orient  $a-b$  into  $a \rightarrow b$  whenever there are two chains  $a-c \rightarrow d$  and  $c \rightarrow d \rightarrow b$  such that  $c$  and  $b$  are nonadjacent and  $a$  and  $d$  are nonadjacent.*

**Proof of Theorem 2** (If:) First, note that there are no compelled edges directed away from  $X$  (which would make  $X$  a non-leaf). Next, note that we can compel each edge  $S-X$  towards  $X$  one-by-one, each time checking if Theorem 3 compels another edge in  $S'-X$  towards  $S'$  instead. If this never happens, then all edges  $S-X$  can be oriented towards  $X$  (which makes  $X$  a possible leaf).

We start by orienting one edge  $S-X$  towards  $S$ . Consider each of the rules in Theorem 3:

$R_1$  cannot be used to orient the edge from  $X \rightarrow S$ . First, if there were some other compelled edge  $Y \rightarrow X$  where  $Y \notin \mathbf{S}$  and  $Y$  is not adjacent to  $S$ , then the edge  $S-X$  should already have been compelled (i.e.,  $P$  was not a CPDAG). Otherwise, we only orient edges from  $S \rightarrow X$  and all  $S \in \mathbf{S}$  are adjacent.

$R_2$  cannot be used to orient the edge from  $X \rightarrow S$ , since there is no chain from  $X$  to  $S$  (which would imply  $X$  was a non-leaf).

$R_3$  cannot be used to orient the edge from  $X \rightarrow S$ , since all potential neighbors  $c$  and  $d$  via an unoriented edge must be adjacent.

$R_4$  cannot be used to orient the edge from  $X \rightarrow S$ , since all potential neighbors  $c$  and  $b$  via an unoriented edge must be adjacent.

Since no rule compels us to orient an edge away from  $X$ , we can orient the edges one-by-one to make  $X$  a leaf.

(Only if:) We show that if  $\mathbf{S}$  is not a clique, then  $X$  is not a leaf. If  $\mathbf{S}$  is not a clique, then there is a pair  $S$  and  $S'$  in  $\mathbf{S}$  that are non-adjacent. If we orient  $S-X$  as  $S \leftarrow X$ , then  $X$  is not a leaf. If we orient  $S-X$  as  $S \rightarrow X$ , then by Theorem 3, Rule  $R_1$ , we must orient  $S'-X$  as  $S' \leftarrow X$ . Hence,  $X$  is not a leaf.  $\square$

### Proofs of Propositions

**Proof of Proposition 1** Follows from the definition of equivalence classes.  $\square$

**Proof of Proposition 2** This path can be constructed by following any path to  $G$  in the BN graph, and then identifying the corresponding CPDAGs in the EC graph.  $\square$

**Proof of Proposition 3** Follows from Theorem 10 in Chickering (1995).  $\square$

**Proof of Proposition 4** Follows from the fact that the canonical ordering is the ordering with the largest reverse lexicographic order.  $\square$

### EXPERIMENTS: EC TREE VS. BN GRAPH

In this section, we provide additional experimental results on EC trees and BN graphs, to gain a deeper insight into their performance differences. We first enumerate the 10-best, 100-best, and 1000-best equivalence classes using an EC tree. Using the BN graph, we then enumerate an equivalent number of DAGs, per dataset; Table 4 (from the main text) reports these numbers. Table 6 summarizes the time (in seconds) and memory (in GB) used by the EC tree and the BN graph, during  $A^*$  search. As seen in the paper, the EC tree is more efficient (both in speed and memory consumption) than the BN graph, up to orders of magnitude differences (at least in time).

Table 7 shows, for the BN graph, the number of generated nodes, expanded nodes, re-expanded nodes (by partial-expansion), and the number of invocations of the oracle. In contrast to the EC tree (from Table 2 in the main text), the BN graph usually expands and generates at least one order of magnitude more nodes, and in some datasets, e.g., *letter*, *msnbc* and *nlcs*, more than three orders of magnitudes. In addition, Table 8 shows the time spent on computing the heuristic function  $T_h$  and the time spent on traversing the search space  $T_{A^*}$ . For the data sets where the  $k$ -best equivalence classes contains a large number of DAGs, i.e., *adult*, *letter*, *msnbc* and *nlcs*, the majority of the time

| benchmark  |     |        | 10-best EC |     |          |     | 100-best EC |     |            |     | 1,000-best EC |     |            |     |
|------------|-----|--------|------------|-----|----------|-----|-------------|-----|------------|-----|---------------|-----|------------|-----|
|            |     |        | EC tree    |     | BN graph |     | EC tree     |     | BN graph   |     | EC tree       |     | BN graph   |     |
| name       | $n$ | $N$    | $t$        | $m$ | $t$      | $m$ | $t$         | $m$ | $t$        | $m$ | $t$           | $m$ | $t$        | $m$ |
| adult      | 14  | 30162  | 0.26       | 1   | 0.47     | 1   | 0.54        | 1   | 1.49       | 1   | 1.19          | 1   | 11.87      | 1   |
| wine       | 14  | 178    | 0.05       | 1   | 0.09     | 1   | 0.15        | 1   | 0.33       | 1   | 0.86          | 1   | 3.89       | 1   |
| nltcs      | 16  | 16181  | 3.36       | 1   | 11.34    | 1   | 5.56        | 1   | 46.91      | 1   | 9.58          | 1   | 1126.05    | 4   |
| letter     | 17  | 20000  | 18.11      | 1   | 20.68    | 1   | 48.31       | 1   | 84.07      | 1   | 81.72         | 1   | 4666.29    | 4   |
| msnbc      | 17  | 291326 | 145.71     | 1   | 896.45   | 2   | 153.05      | 1   | $\times_t$ |     | 155.07        | 1   | $\times_t$ |     |
| voting     | 17  | 435    | 1.89       | 1   | 2.86     | 1   | 2.11        | 1   | 3.70       | 1   | 6.67          | 1   | 17.89      | 1   |
| zoo        | 17  | 101    | 2.89       | 1   | 5.09     | 1   | 3.59        | 1   | 5.85       | 1   | 6.03          | 1   | 10.34      | 1   |
| statlog    | 19  | 752    | 29.28      | 1   | 51.89    | 1   | 41.99       | 1   | 73.77      | 1   | 43.89         | 1   | 76.99      | 1   |
| hepatitis  | 20  | 126    | 36.33      | 1   | 86.05    | 2   | 63.37       | 1   | 176.83     | 2   | 101.05        | 2   | 284.46     | 4   |
| imports    | 22  | 205    | 174.84     | 4   | 455.65   | 8   | 223.78      | 4   | 603.68     | 8   | 224.11        | 4   | 604.14     | 8   |
| parkinsons | 23  | 195    | 897.81     | 8   | 779.90   | 16  | 897.97      | 8   | 1034.50    | 16  | 898.68        | 8   | 1450.46    | 16  |

Table 6: Time  $t$  (in seconds) and memory  $m$  (in GBs) used by EC tree and BN graph.  $n$  is the number of variables in the dataset, and  $N$  is the size of the dataset. A  $\times_t$  corresponds to an out-of-time (2hr).

| benchmark  |     | 10-best EC |         |          |        | 100-best EC |        |         |        | 1,000-best EC |         |           |        |
|------------|-----|------------|---------|----------|--------|-------------|--------|---------|--------|---------------|---------|-----------|--------|
| name       | $n$ | gen.       | exp.    | re-exp.  | invoke | gen.        | exp.   | re-exp. | invoke | gen.          | exp.    | re-exp.   | invoke |
| adult      | 14  | 1672       | 1352    | 3852     | 173    | 30619       | 27015  | 179312  | 634    | 245687        | 215753  | 2602353   | 1050   |
| wine       | 14  | 8203       | 3714    | 0        | 107    | 44209       | 23572  | 23124   | 274    | 461799        | 254154  | 500024    | 595    |
| nltcs      | 16  | 56719      | 53572   | 452232   | 633    | 326813      | 314528 | 6021330 | 1372   | 2727808       | 2605978 | 82512570  | 2180   |
| letter     | 17  | 16296      | 16227   | 153430   | 678    | 230931      | 230931 | 4948105 | 2726   | 5443620       | 5424968 | 213643716 | 4963   |
| msnbc      | 17  | 1288695    | 1288339 | 10564990 | 2695   | $\times_t$  |        |         |        | $\times_t$    |         |           |        |
| voting     | 17  | 5314       | 4364    | 346      | 147    | 72658       | 50004  | 99182   | 413    | 114498        | 106378  | 421512    | 3965   |
| zoo        | 17  | 1049       | 704     | 0        | 330    | 12003       | 3875   | 3498    | 539    | 53562         | 47162   | 41698     | 1695   |
| statlog    | 19  | 1915       | 1558    | 0        | 212    | 19653       | 12847  | 12403   | 628    | 153048        | 101570  | 194334    | 1029   |
| hepatitis  | 20  | 18726      | 15470   | 0        | 4645   | 167033      | 105997 | 105105  | 13223  | 1378039       | 720381  | 1422924   | 31854  |
| imports    | 22  | 1023       | 295     | 0        | 150    | 8041        | 2724   | 0       | 404    | 41007         | 21475   | 0         | 426    |
| parkinsons | 23  | 8233       | 2732    | 0        | 290    | 32136       | 10189  | 0       | 652    | 151200        | 58802   | 0         | 1273   |

Table 7: BN graph: number of nodes (1) generated, (2) expanded, (3) re-expanded, and (4) oracle invocations.

| benchmark  |     | 10-best EC |           | 100-best EC |           | 1,000-best EC |           |
|------------|-----|------------|-----------|-------------|-----------|---------------|-----------|
| name       | $n$ | $T_h$      | $T_{A^*}$ | $T_h$       | $T_{A^*}$ | $T_h$         | $T_{A^*}$ |
| adult      | 14  | 0.46       | 0.02      | 0.88        | 0.61      | 1.11          | 10.76     |
| wine       | 14  | 0.05       | 0.04      | 0.06        | 0.26      | 0.12          | 3.77      |
| nltcs      | 16  | 9.22       | 2.11      | 15.00       | 31.90     | 18.23         | 1107.81   |
| letter     | 17  | 19.52      | 1.16      | 48.28       | 35.79     | 70.22         | 4596.07   |
| msnbc      | 17  | 126.34     | 770.11    | $\times_t$  |           | $\times_t$    |           |
| voting     | 17  | 2.80       | 0.06      | 2.86        | 0.84      | 7.32          | 10.57     |
| zoo        | 17  | 5.06       | 0.02      | 5.77        | 0.09      | 9.69          | 0.65      |
| statlog    | 19  | 51.78      | 0.11      | 73.47       | 0.30      | 75.31         | 1.68      |
| hepatitis  | 20  | 85.56      | 0.48      | 174.07      | 2.76      | 263.28        | 21.18     |
| imports    | 22  | 454.71     | 0.93      | 602.49      | 1.19      | 602.71        | 1.43      |
| parkinsons | 23  | 778.45     | 1.45      | 1032.56     | 1.94      | 1447.56       | 2.89      |

Table 8: Time  $T_h$  to compute the heuristic function and time  $T_{A^*}$  spent in  $A^*$  search, in the BN graph (in seconds).

is spent on exploring the search space, rather the computing the heuristic function. This is in contrast to the EC tree, illustrated in Table 3, and the smaller datasets in Table 8, where the heuristic function is the performance bottleneck. However, on the EC tree, for

these larger datasets, only a very small amount of time is used to traverse the search space (in Table 3), which shows that the EC tree is a more compact and efficient search space for enumerating equivalence classes.
